# Supplementary material
Source: PubMed Central journal article supplement (PMC5201199)
Supplement: NIHMS70697-supplement-Supplement.pdf [file NIHMS70697-supplement-Supplement.pdf]

## Gender and developmental specific N-glycomes of the porcine parasite *Oesophagostomum dentatum*

Carmen Jimenez-Castells, Jorick Vanbeselaere, Sonja Kohlhuber, Bärbel Ruttkowski,  
Anja Joachim and Katharina Paschinger

### Supplementary Data

**Scheme: Glycomic workflow for analysis of *O. dentatum* N-glycans.** The basic approaches to isolate the N-glycans are shown, indicating that either serial PNGase F/A digestion, PNGase A alone or hydrazinolysis were employed. While the PNGase A only digests (for overall MALDI-TOF MS see Supplementary Figure 1) were subject to 2D-HPLC (NP-HPLC followed by RP-HPLC on C18; see Figure 1) as well as RP-amide HPLC, the other N-glycan pools were subject to 1D-HPLC (RP-amide only; see Figures 2 and 3 as well as Supplementary Figures 2 and 3). All RP-C18 and RP-amide HPLC fractions were subject to MALDI-TOF MS and MS/MS for which selected data before and after enzymatic/chemical digestions are shown in Figures 4-7.

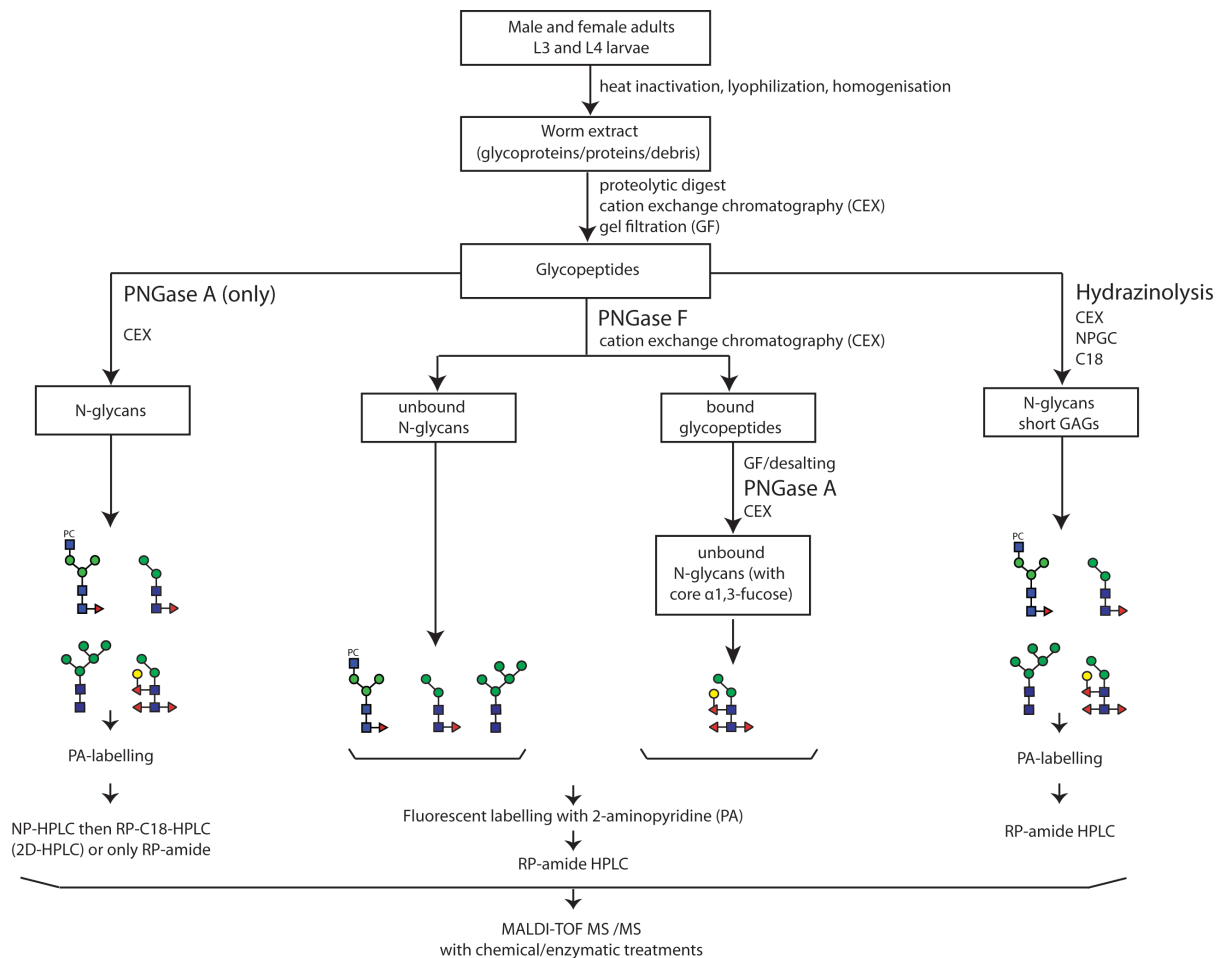

**Supplementary Figure S1: MALDI-TOF MS profiling of pyridylaminated PNGase A-released N-glycans from *O. dentatum*.** Positive mode MALDI-TOF mass spectra of the unfractionated PNGase A-released glycans from L3 and L4 larvae and male and female adults are shown with the major protonated pyridylaminated species annotated with the relevant  $m/z$  (red, pauci- and oligomannosidic; blue, phosphorylcholine-modified; black, fucosylated and hybrid/complex; asterisks indicate oligohexose contaminants of the larval preparations). The intensities are given in arbitrary units (a.u.); sodiated adducts are not annotated but are present particularly in the L4 preparation; as the L4 stage is maintained in porcine serum, some glycans of mammalian origin are also present (e.g., Hex<sub>3</sub>HexNAc<sub>5</sub>Fuc<sub>1</sub> and Hex<sub>5-6</sub>HexNAc<sub>4</sub>Fuc<sub>1</sub>; annotated with 'M').

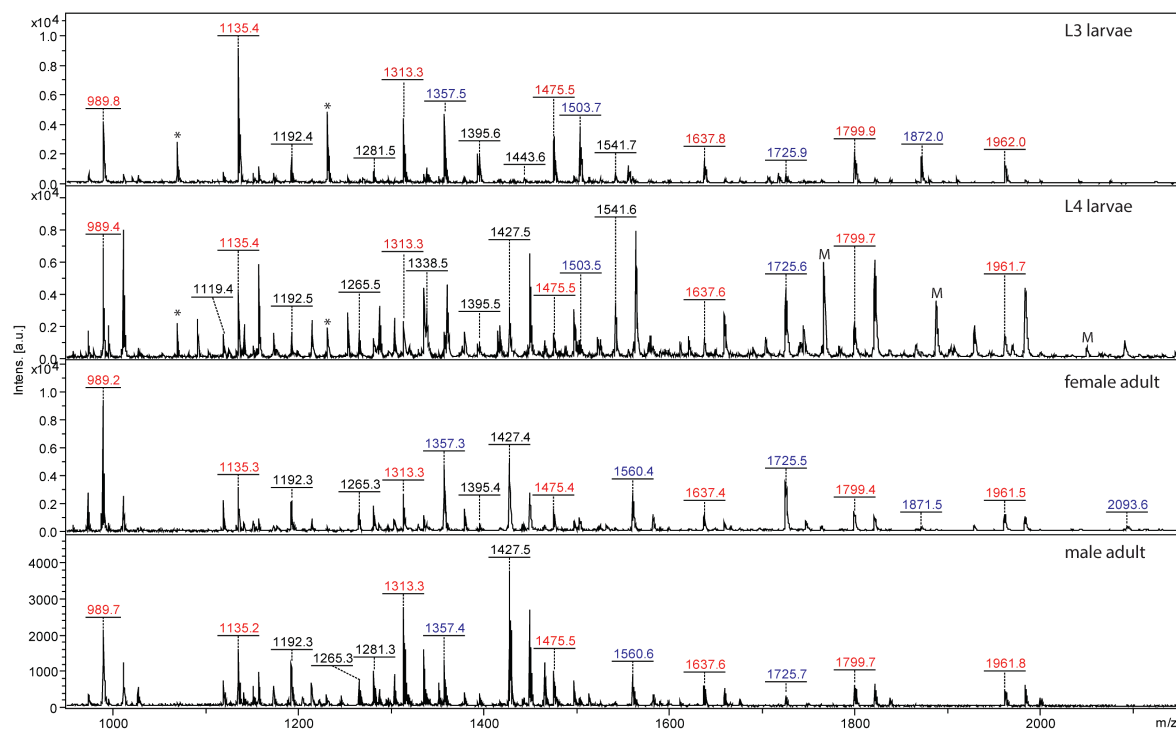

**Supplementary Figure S2:** RP-amide chromatograms of larval (*O. dentatum* L4) PNGase A and PNGase F-released glycans; M indicates mammalian-like glycans probably originating from pig serum used during maintenance. The oligoglucose standard chromatogram is shown in red and annotated with glucose units. Structural variance is reduced as compared to *O. dentatum* adults. The fluorescence scale (excitation/emission 320/400 nm) is in millivolts.

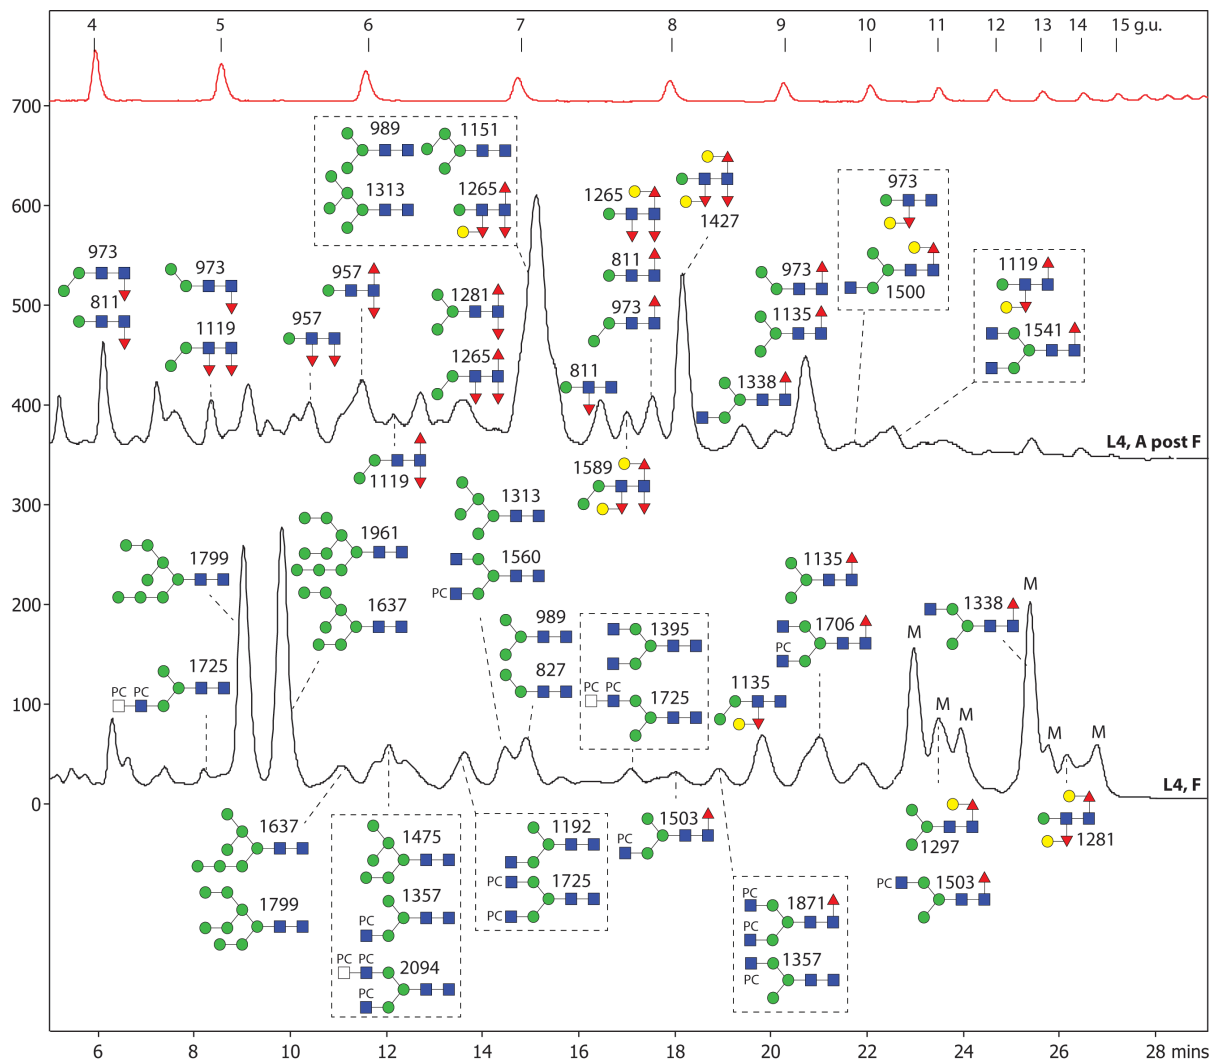

**Supplementary Figure S3:** RP-amide chromatograms of hydrazine-released N-glycans from male and female adult *O. dentatum*. Peaks are annotated with proposed structures and retention times in terms of minutes and glucose units. The fluorescence scale (excitation/emission 320/400 nm) is in volts.

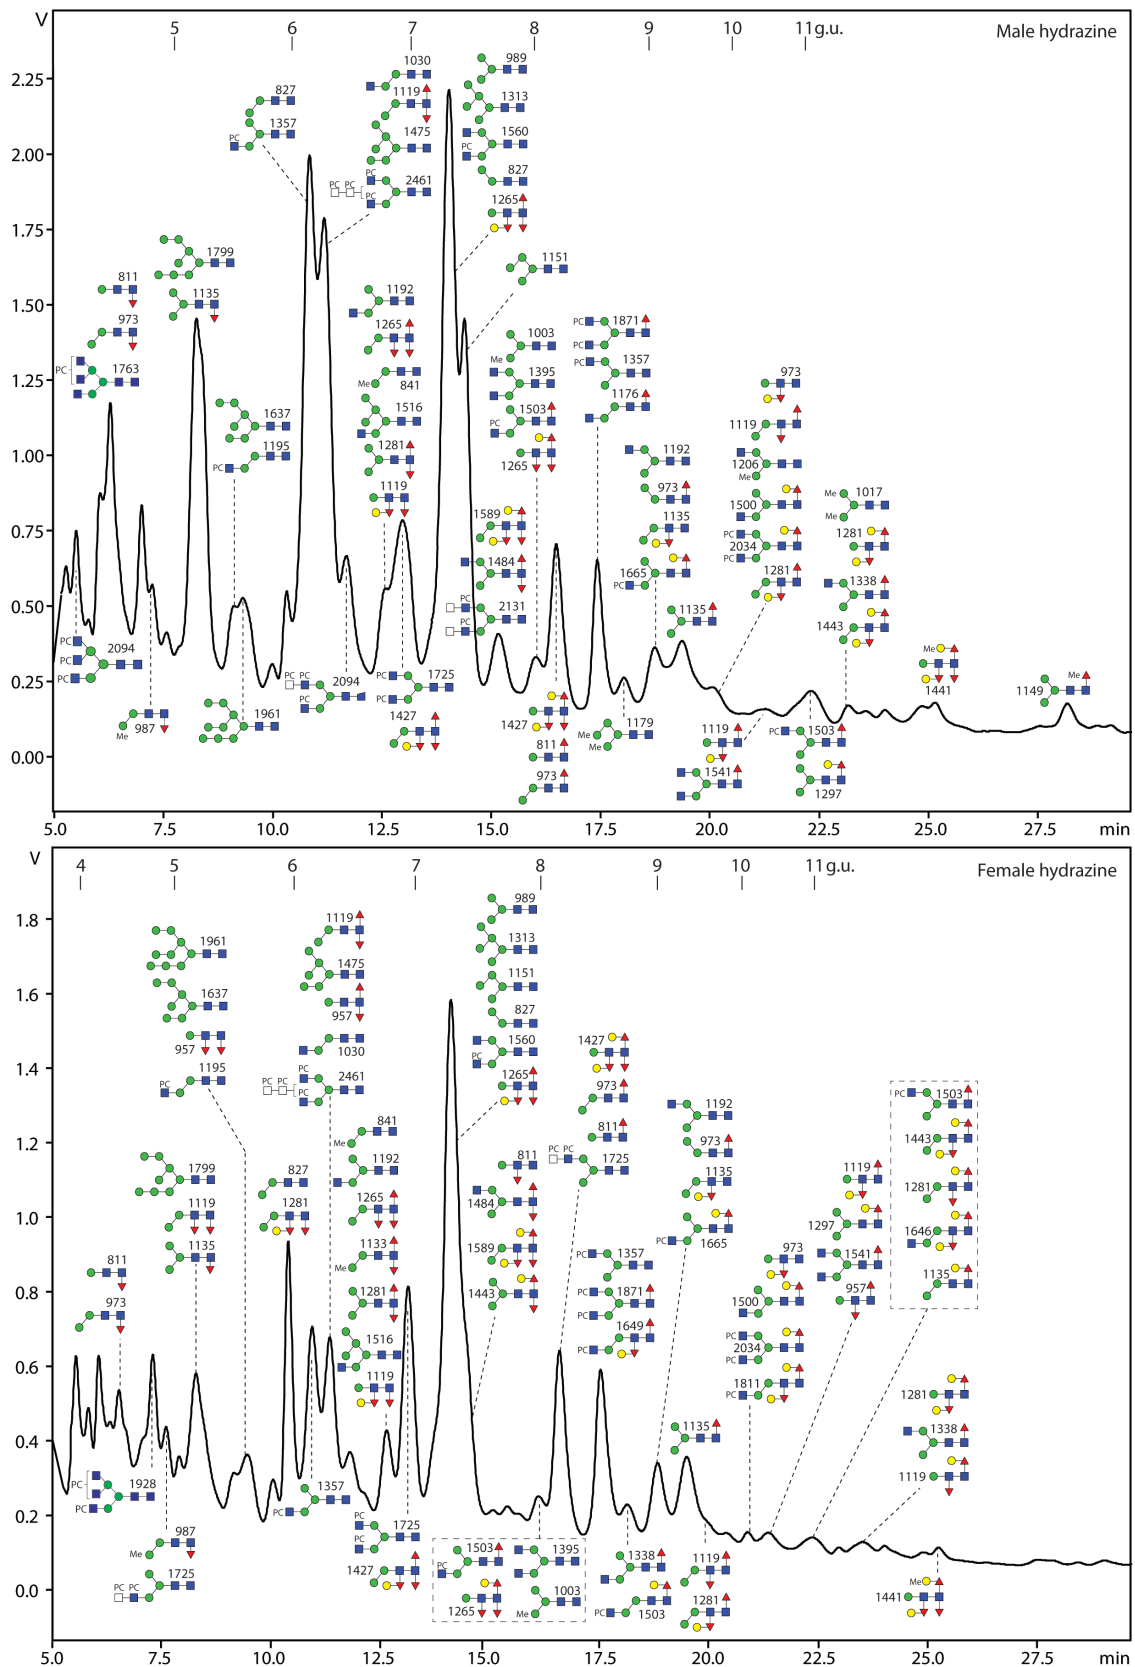

## Supplementary Table

A summary of structures, elution times, occurrence in different preparations (male, female, L3 and L4 PNGase A only; male and female A post F; male and female F; male and female hydrazine-released N-glycans) as well as evidence for the structural annotations with reference to relevant figures in the main text.

The PNGase A post PNGase F ('A post F') digests lack many of the low abundance structures present in the previous PNGase F ('F') digests, whereas the PNGase A only ('A only') and hydrazine digests contain structures present in both the 'F' and 'A post F' digests; PNGase A and hydrazine, but not PNGase F, are capable of releasing N-glycans with a proximal (reducing terminal) core  $\alpha$ 1,3-fucose.

For the 2D-HPLC analyses (NP then RP-HPLC followed by MALDI-TOF MS of PNGase A only digests), percentage abundances are given based on integration of fluorescent intensities; for the 1D-HPLC analyses (RP-amide then MALDI-TOF MS of male and female A post F, female A only, male and female F and male and female hydrazine-released N-glycans) only qualitative information is shown (+, present; nd, not determined; trace, low amount).

| Structure | m/z    | RP-amide g.u. | % in RP (2D-HPLC, A only) |        |      |    | RP-amide (1D) occurrence |                 |               |        |          |           | Evidence                                                                                                                                                     |
|-----------|--------|---------------|---------------------------|--------|------|----|--------------------------|-----------------|---------------|--------|----------|-----------|--------------------------------------------------------------------------------------------------------------------------------------------------------------|
|           |        |               | male                      | female | L4   | L3 | male A post F            | female A post F | female A only | male F | female F | Hydrazine |                                                                                                                                                              |
|           | 811.35 | 4.3           | nd                        | nd     | 0.21 | nd | +                        | +               | +             | nd     | nd       | M, F      | Key fragment: 446, 665<br>Sensitive to HF (-1F) then MS/MS frag. 300 (no proximal Fuc)<br>coelution with Pristionchus and Haemonchus                         |
|           | 811.35 | 7.5           | nd                        | nd     | nd   | nd | trace                    | trace           | +             | +      | +        | M, F      | Key fragments: 300 (no proximal fucose), 665<br>coelution with Pristionchus and Haemonchus                                                                   |
|           | 811.35 | 8.2           | nd                        | nd     | nd   | nd | +                        | +               | +             | +      | +        | M, F      | Key fragments: 446, 665<br>coelution with Pristionchus and Haemonchus                                                                                        |
|           | 827.34 | 6.0           | 2,92                      | 1,35   | 0.08 | nd | +                        | +               | +             | +      | +        | M, F      | Key fragments: 300, 665<br>Sensitive to 3Man (-1H)<br>coelution with Pristionchus and Haemonchus                                                             |
|           | 827.34 | 6.8           | 0.34                      | 2.58   | 0.75 | nd | +                        | +               | +             | +      | +        | M, F      | Key fragments: 300, 665<br>Sensitive to 6Man (-1H)<br>coelution with Pristionchus and Haemonchus                                                             |
|           | 841.36 | 6.6           | nd                        | nd     | nd   | nd | +                        | +               | +             | +      | +        | M, F      | Key fragments: 300, 665<br>Elutes after 827 isomer at 6.0 g.u.                                                                                               |
|           | 957.40 | 5.5           | nd                        | 0.48   | 0.04 | nd | trace                    | +               | +             | nd     | nd       | M, F      | Key fragments: 446, 811 (loss of 146)<br>Sensitive to HF (-2F), then MS/MS frag. 300 (loss of distal and proximal Fuc)                                       |
|           | 957.40 | 6.0           | nd                        | nd     | 0.32 | nd | nd                       | +               | +             | nd     | nd       | M, F      | Key fragments: 446, 592, 811<br>Sensitive to HF (-1F) then MS/MS frag. 446<br>coelution with Pristionchus                                                    |
|           | 957.40 | 10.2          | nd                        | nd     | nd   | nd | nd                       | nd              | +             | trace  | trace    | M, F      | Key fragments: 446, 665, 811<br>Sensitive to bovine Fuc (-1F), then MS/MS frag. 300 (loss of proximal Fuc)<br>Sensitive to HF (-1F), MS/MS still with 446    |
|           | 973.40 | 4.3           | 0.73                      | 1.47   | nd   | nd | +                        | +               | +             | nd     | nd       | M, F      | Key fragments: 446, 827<br>Sensitive to 3Man (-1H)<br>Sensitive to HF (-1F) then MS/MS frag. 300 (no core Fuc)<br>coelution with Pristionchus and Haemonchus |
|           | 973.40 | 5.2           | nd                        | nd     | nd   | nd | trace                    | trace           | trace         | nd     | nd       | nd        | Key fragments: 446, 827<br>coelution with Pristionchus                                                                                                       |
|           | 973.40 | 8.2           | nd                        | nd     | nd   | nd | +                        | +               | +             | +      | +        | M, F      | Key fragments: 446, 827<br>Sensitive to 3Man (-1H)<br>coelution with Pristionchus and Haemonchus                                                             |
|           | 973.40 | 8.8           | 0.34                      | 0.92   | 0.70 | nd | +                        | +               | +             | +      | +        | M, F      | Key fragments: 446, 827<br>Sensitive to 6Man (-1H), Resistant to 3Man<br>coelution with Pristionchus and Haemonchus                                          |
|           | 973.40 | 9.8           | nd                        | 0.75   | 0.18 | nd | +                        | +               | +             | +      | +        | M, F      | Key fragments: 300, 665, 811 (no proximal Fuc)<br>Resistant to 3Man<br>Sensitive to HF (-FH)                                                                 |
|           | 973.40 | 11.5-12.5     | nd                        | nd     | nd   | nd | nd                       | nd              | +             | +      | +        | nd        | Key fragments: 608, 665                                                                                                                                      |
|           | 987.41 | 4.8           | 0.49                      | 1.62   | nd   | nd | +                        | +               | +             | nd     | nd       | M, F      | Key fragments: 446, 841 (eluting after 973 isomer at 4.3 g.u.)<br>Sensitive to HF (-1F) then MS/MS frag. 300 (loss of core Fuc)<br>Resistant to bovFuc       |

| Structure | m/z     | RP-amide g.u. | % in RP (2D-HPLC, A only) |        |       |       | RP-amide (1D) occurrence |                 |               |        |          |           | Evidence                                                                                                                                                                                               |
|-----------|---------|---------------|---------------------------|--------|-------|-------|--------------------------|-----------------|---------------|--------|----------|-----------|--------------------------------------------------------------------------------------------------------------------------------------------------------------------------------------------------------|
|           |         |               | male                      | female | L4    | L3    | male A post F            | female A post F | female A only | male F | female F | Hydrazine |                                                                                                                                                                                                        |
|           | 989.39  | 7.2           | 14.52                     | 18.44  | 10.92 | 1.65  | +                        | +               | +             | +      | +        | M, F      | Key fragments: 300, 827<br>Sensitive to 3Man (-1H), Sensitive to JBMan (-2H)<br>coelution with Pristionchus and Haemonchus                                                                             |
|           | 1003.41 | 7.6           | 0.60                      | nd     | nd    | nd    | +                        | trace           | trace         | +      | trace    | M, F      | Key fragments: 300, 841 (Figure 6B)<br>Resistant to 3Man but sensitive to JBMan (-1H)                                                                                                                  |
|           | 1017.42 | 11.5-12.5     | 0.72                      | nd     | nd    | nd    | +                        | trace           | trace         | +      | trace    | M         | Key fragments: 300, 717, 841 (Figure 6C)                                                                                                                                                               |
|           | 1030.42 | 6.2           | 1.58                      | 0.15   | nd    | nd    | +                        | +               | +             | +      | +        | M, F      | Key fragments: 365, 665<br>Sensitive to FDL (-1N)<br>coelution with Pristionchus                                                                                                                       |
|           | 1103.46 | 7.2           | nd                        | nd     | nd    | nd    | trace                    | trace           | trace         | nd     | nd       | trace     | Key fragments: 446, 592, 811 (-2 x 146)                                                                                                                                                                |
|           | 1119.46 | 5.2           | 0.11                      | 0.27   | 0.01  | nd    | +                        | +               | +             | nd     | nd       | F         | Key fragments: 446, 827, 973<br>Sensitive to 3Man (-1H)<br>Sensitive to HF (-2F; Figure 4A/B) then MS/MS frag. 300 (loss of core Fuc)<br>coelution with Pristionchus                                   |
|           | 1119.46 | 6.2           | 0.58                      | 1.42   | 1.44  | nd    | +                        | +               | +             | nd     | nd       | M, F      | Key fragments: 446, 592, 973<br>Sensitive to 3Man (-1H)<br>Sensitive to HF (-1F) then MS/MS frag. 446<br>coelution with Pristionchus and Haemonchus                                                    |
|           | 1119.46 | 6.6           | nd                        | nd     | nd    | nd    | +                        | +               | +             | nd     | nd       | M, F      | Key fragments: 446, 665, 811 (loss of 308), 957, 973<br>Sensitive to HF (-F/FH), then MS/MS frag. 300<br>Resistant to 3Man                                                                             |
|           | 1119.46 | 9.6           | nd                        | nd     | nd    | nd    | nd                       | nd              | +             | +      | +        | M, F      | Key fragments: 446, 827, 973 (loss of 146)<br>Sensitive to 3Man (-1H)                                                                                                                                  |
|           | 1119.46 | 10.2          | 0.24                      | 0.48   | 0.15  | nd    | trace                    | +               | +             | +      | +        | M, F      | Key fragments: 446, 665, 811 (loss of 308), 957, 973<br>Resistant to 3Man, but sensitive to HF (-FH) then MS/MS frag. 446, 665<br>Sensitive to bov Fuc (-1F), then MS/MS frag. 300 (loss of core Fuc)  |
|           | 1119.46 | 11.5-12.5     | nd                        | nd     | nd    | nd    | nd                       | nd              | +             | +      | +        | trace     | Key fragments: 608, 665, 811, 973 (loss of 146)                                                                                                                                                        |
|           | 1133.47 | 6.7           | nd                        | nd     | nd    | nd    | +                        | +               | +             | nd     | nd       | trace     | Key fragments: 446, 592, 841, 987<br>Elution after 1119 isomer at 6.2 g.u.                                                                                                                             |
|           | 1135.45 | 5.2           | 0.34                      | 0.27   | 0.01  | 1.03  | +                        | +               | +             | nd     | nd       | trace     | Key fragments: 446, 827, 989 (Figure 4A/B)<br>Sensitive to 3Man (-1H)<br>Sensitive to HF (-1F) then MS/MS frag. 300 (loss of core Fuc)<br>coelution with Pristionchus and Haemonchus                   |
|           | 1135.45 | 8.8           | 0.31                      | 1.03   | 0.28  | nd    | +                        | +               | +             | +      | +        | trace     | Key fragments: 300 (no proximal Fuc), 827 (loss of 308)<br>Sensitive to 3Man (-1H)<br>Sensitive to HF (-FH; Figure 4C/D)<br>coelution with Haemonchus                                                  |
|           | 1135.45 | 9.3           | 2.93                      | 4.03   | 6.98  | 17.49 | +                        | +               | +             | +      | +        | M, F      | Key fragments: 446, 973, 989 (Figure 4E/F)<br>Sensitive to 3Man (-1H) Sensitive to JBMan (-2H)<br>Sensitive to BovFuc (-1F) then MS/MS 300 (no core Fuc)<br>coelution with Pristionchus and Haemonchus |
|           | 1135.45 | 11.0          | nd                        | nd     | nd    | nd    | trace                    | trace           | +             | +      | +        | M, F      | Key fragments: 608, 827 (Figure 4G/H)<br>Sensitive to β4Gal (-1H), then MS/MS frag. 446<br>Resistant to bovine Fuc                                                                                     |

| Structure | m/z     | RP-amide g.u. | % in RP (2D-HPLC, A only) |        |      |      | RP-amide (1D) occurrence |                 |               |        |          |           | Evidence |                                                                                                                                                                                                                                    |
|-----------|---------|---------------|---------------------------|--------|------|------|--------------------------|-----------------|---------------|--------|----------|-----------|----------|------------------------------------------------------------------------------------------------------------------------------------------------------------------------------------------------------------------------------------|
|           |         |               | male                      | female | L4   | L3   | male A post F            | female A post F | female A only | male F | female F | Hydrazine |          |                                                                                                                                                                                                                                    |
|           | 1149.47 | >12           | nd                        | nd     | nd   | nd   | nd                       | nd              | nd            | nd     | trace    | nd        | M        | Key fragments: 460, 989 (loss of 160; Figure 6D)                                                                                                                                                                                   |
|           | 1151.45 | 7.2           | 1.72                      | 1.75   | 1.16 | 0.05 | +                        | +               | +             | +      | +        | +         | M, F     | Key fragments: 300, 827, 989<br>Sensitive to 3Man (-1H) and sensitive to JbMan (-3H)<br>coelution with Pristionchus and Haemonchus                                                                                                 |
|           | 1176.48 | 8.3           | nd                        | nd     | nd   | nd   | nd                       | nd              | nd            | nd     | nd       | nd        | M        | Key fragments: 446, 811, 1030                                                                                                                                                                                                      |
|           | 1179.48 | 8.5           | nd                        | nd     | nd   | nd   | nd                       | nd              | nd            | +      | nd       | nd        | M        | Key fragments: 177, 841, 1003<br>Elution after 1151 at 7.2 g.u.                                                                                                                                                                    |
|           | 1192.47 | 6.6           | 2.36                      | 0.59   | 4.78 | 2.33 | +                        | +               | +             | +      | +        | +         | M, F     | Key fragment: 1030<br>Resistant to 3Man<br>coelution with Pristionchus and Haemonchus                                                                                                                                              |
|           | 1192.47 | 8.8           | 3.65                      | 3.85   | 1.82 | 1.19 | +                        | +               | +             | +      | +        | +         | M, F     | Key fragments: 365, 989<br>Sensitive to 3Man (-1H)<br>coelution with Pristionchus and Haemonchus                                                                                                                                   |
|           | 1195.48 | 5.5           | nd                        | nd     | nd   | nd   | +                        | +               | +             | +      | +        | +         | M, F     | Key fragments: 369, 531<br>coelution with Pristionchus (elution before 1030 at 6.2 g.u.)                                                                                                                                           |
|           | 1195.48 | 7.8           | nd                        | nd     | nd   | nd   | +                        | +               | +             | +      | +        | +         | nd       | Key fragments: 369, 531                                                                                                                                                                                                            |
|           | 1206.49 | 9.7           | trace                     | trace  | nd   | nd   | trace                    | nd              | +             | trace  | trace    | trace     | M, F     | Key fragments: 841, 1003<br>Elution after 1192 isomer at 8.8 g.u.<br>Resistant to FDL                                                                                                                                              |
|           | 1265.51 | 6.6           | 0.42                      | 0.30   | 0.13 | 1.69 | +                        | +               | +             | nd     | nd       | nd        | M, F     | Key fragments: 446, 592, 827, 973, 1119 (Figure 4I)<br>Sensitive to 3Man (-1H)<br>Sensitive to HF (-2F) then MS/MS frag. 446 (loss of one proximal Fuc)<br>coelution with Pristionchus and Haemonchus                              |
|           | 1265.51 | 7.2           | 1.64                      | 1.37   | 1.22 | nd   | +                        | +               | +             | nd     | nd       | nd        | M, F     | Key fragments: 446, 592, 665, 957 (loss of 308), 1103, 1119 (Figure 4J)<br>Resistant to 3Man<br>Sensitive to HF (-F/FH) then MS/MS frag. 446 (loss of one proximal Fuc)                                                            |
|           | 1265.51 | 7.8           | 0.79                      | 0.80   | 1.51 | nd   | +                        | +               | +             | nd     | nd       | nd        | M, F     | Key fragments: 608, 665, 754, 957, 1119 (loss of 146; Figure 4K)<br>Sensitive to β4Gal (-1H) then MS/MS frag. 446, 592<br>Sensitive to HF (-2F) then MS/MS frag. 608, 665 (loss of proximal Fuc)                                   |
|           | 1279.53 | 10.2          | nd                        | nd     | nd   | nd   | nd                       | nd              | +             | nd     | nd       | nd        | F        | Key fragments: 446, 592, 1119 (loss of 160), 1133 (Figure 6E)<br>Sensitive to HF (-F/FMe), then MS/MS frag. 446 (loss of one proximal Fuc)<br>Sensitive to 3 Man (-1H) and bov Fuc (-1F) then MS/MS 446 (loss of one proximal Fuc) |
|           | 1281.51 | 6.0           | 1.29                      | 2.19   | nd   | nd   | nd                       | +               | +             | nd     | nd       | nd        | F        | Key fragments: 446, 827, 973 (loss of 308), 1119, 1135 (Figure 4L)<br>Sensitive to 3Man (-H) then MS/MS frag. 446, 811 (loss of 308)<br>Sensitive to HF (-F/FH) then MS/MS frag. 300 (no core Fuc)<br>coelution with Haemonchus    |
|           | 1281.51 | 6.6           | 0.28                      | 0.20   | 0.51 | 0.42 | +                        | +               | +             | nd     | nd       | nd        | M, F     | Key fragments: 446, 592, 1119, 1135 (Figure 4M)<br>Sensitive to 3Man (-1H)<br>Sensitive to HF (-1F) then MS/MS frag. 446 (loss of one proximal Fuc)<br>coelution with Pristionchus and Haemonchus                                  |
|           | 1281.51 | 9.3           | nd                        | nd     | nd   | 1.19 | nd                       | nd              | +             | +      | +        | +         | trace    | Key fragments: 446, 973 (loss of 308), 1119, 1135 (Figure 4N)<br>Sensitive to HF (-FH) then MS/MS still with 446 (no loss of proximal Fuc)<br>Sensitive to 3Man (-1H)<br>coelution with Haemonchus                                 |



| Structure | m/z     | RP-amide g.u. | % in RP (2D-HPLC, A only) |        |      |      | RP-amide (1D) occurrence |                 |               |        |          |           | Evidence                                                                                                                                                                                                                                      |
|-----------|---------|---------------|---------------------------|--------|------|------|--------------------------|-----------------|---------------|--------|----------|-----------|-----------------------------------------------------------------------------------------------------------------------------------------------------------------------------------------------------------------------------------------------|
|           |         |               | male                      | female | L4   | L3   | male A post F            | female A post F | female A only | male F | female F | Hydrazine |                                                                                                                                                                                                                                               |
|           | 1281.51 | 10.5-11.5     | nd                        | nd     | nd   | nd   | nd                       | nd              | +             | +      | +        | M, F      | Key fragments: 608, 827, 1135 (Figure 4O)<br>Sensitive to 3Man (-1H)<br>Corresponds to one glycan in hex-2;hex-3 mutant                                                                                                                       |
|           | 1281.51 | 11.5-12.5     | nd                        | nd     | 0.49 | nd   | +                        | nd              | +             | +      | +        | M, F      | Key fragments: 608, 665, 973 (loss of 308), 1119 (Figure 4P)<br>Resistant to 3Man<br>Sensitive to HF (-FH) then MS/MS frag. 608, 665                                                                                                          |
|           | 1295.52 | 6.6           | nd                        | 0.56   | nd   | nd   | nd                       | +               | +             | nd     | nd       | trace     | Key fragments: 446, 841, 987 (loss of 308), 1133, 1149 (Figure 6A)<br>Sensitive to HF (-FH/F) then MS/MS frag. 300 (no core Fuc)<br>Elution after 1281 isomer at 6.0 g.u.                                                                     |
|           | 1295.52 | >14           | nd                        | nd     | nd   | nd   | nd                       | nd              | nd            | nd     | +        | nd        | Key fragments: 621, 665, 973, 987 (loss of 308)                                                                                                                                                                                               |
|           | 1297.50 | 10-11         | nd                        | nd     | 0.18 | nd   | +                        | +               | +             | +      | +        | M, F      | Key fragments: 608, 827, 989<br>Sensitive to $\beta$ 4Gal (-1H; Figure 4G/H), then MS/MS frag. 446<br>Sensitive to 3Man (-1H); coelution with Pristionchus                                                                                    |
|           | 1313.50 | 7.0           | 8.00                      | 9.33   | 8.19 | 8.72 | +                        | +               | +             | +      | +        | M, F      | Key fragment: 827<br>coelution with Pristionchus and Haemonchus                                                                                                                                                                               |
|           | 1338.53 | 8.5           | nd                        | nd     | 2.71 | 0.92 | +                        | trace           | +             | +      | +        | M, F      | Key fragments: 446, 1176<br>Sensitive to FDL (-1N)<br>coelution with Pristionchus and Haemonchus                                                                                                                                              |
|           | 1338.53 | 11.5-12       | nd                        | nd     | 0.28 | 1.46 | trace                    | nd              | +             | +      | +        | M, F      | Key fragments: 446, 973, 1135<br>coelution with Pristionchus and Haemonchus                                                                                                                                                                   |
|           | 1341.53 | 7.7           | nd                        | nd     | nd   | nd   | trace                    | nd              | trace         | trace  | trace    | nd        | Key fragments: 369, loss of 446; elution before 1176 at 8.3 g.u.<br>coelution with Pristionchus                                                                                                                                               |
|           | 1357.53 | 6.0           | 3.56                      | 2.28   | 4.13 | 7.28 | +                        | +               | +             | +      | +        | M, F      | Key fragments: 369, 531, 1195 (loss of 162)<br>Sensitive to HF (-1PC) then MS/MS frags. 300, 1030<br>afterwards sensitive to FDL (-1N)<br>coelution with Pristionchus and Haemonchus                                                          |
|           | 1357.53 | 8.5           | 1.55                      | 0.25   | 0.83 | nd   | +                        | +               | +             | +      | +        | M, F      | Key fragments: 369, 531<br>Elution before 1192 isomer at 8.8 g.u.<br>coelution with Pristionchus                                                                                                                                              |
|           | 1395.55 | 7.8           | 0.47                      | 0.25   | 3.83 | 0.65 | +                        | +               | +             | +      | +        | M, F      | Key fragments: 365, 1030, 1192<br>coelution with Pristionchus and Haemonchus                                                                                                                                                                  |
|           | 1427.57 | 6.8           | 3.37                      | 9.50   | nd   | nd   | +                        | +               | +             | nd     | nd       | M, F      | Key fragments: 446, 592, 827, 1119 (loss of 308), 1265, 1281 (Figure 5A-D)<br>Sensitive to 3Man (-1H)<br>Sensitive to HF (-F/FH) then MS/MS frag. 446<br>coelution with Haemonchus                                                            |
|           | 1427.57 | 8.0           | 4.82                      | 7.50   | 3.86 | 0.44 | +                        | +               | +             | nd     | nd       | M, F      | Key fragments: 608, 665, 754, 973, 1119 (loss of 308; Figure 5E-I)<br>Sensitive to $\beta$ 4Gal (-1H) then MS/MS frags. 446, 592<br>Sensitive to HF (-F/FH) then MS/MS frags. 300, 608, 665<br>Resistant to 3Man; coelution with Pristionchus |
|           | 1441.58 | 7.2           | 0.28                      | 0.73   | nd   | nd   | nd                       | nd              | +             | nd     | nd       | trace     | Key fragments: 446, 592, 841, 987, 1133 (loss of 308), 1295, 1279 (Figure 6F)<br>Sensitive to HF (-F/FH) then MS/MS frag. 446                                                                                                                 |
|           | 1441.58 | 10.2          | nd                        | nd     | nd   | nd   | nd                       | nd              | +             | nd     | nd       | nd        | Key fragments: 446, 606, 1281 (loss of 160; Figure 6G)<br>Sensitive to 3Man (-1H) and bovine Fuc (-1F; then 460 fragment)<br>Sensitive to HF (-FMe/-FH), then MS/MS frag. 446                                                                 |

| Structure                                                                           | m/z     | RP-amide g.u. | % in RP (2D-HPLC, A only) |        |      |       | RP-amide (1D) occurrence |                 |               |        |          |           | Evidence                                                                                                                                                       |
|-------------------------------------------------------------------------------------|---------|---------------|---------------------------|--------|------|-------|--------------------------|-----------------|---------------|--------|----------|-----------|----------------------------------------------------------------------------------------------------------------------------------------------------------------|
|                                                                                     |         |               | male                      | female | L4   | L3    | male A post F            | female A post F | female A only | male F | female F | Hydrazine |                                                                                                                                                                |
|    | 1441.58 | 14            | 0.37                      | 0.44   | nd   | nd    | +                        | +               | +             | nd     | nd       | M, F      | Key fragments: 446, 622, 768, 1133 (loss of 308), 1279, 1295 (Figure 6H)<br>Sensitive to HF (-F/FH) then MS/MS frag. 622, 665<br>Resistant to β4Gal            |
|    | 1443.56 | 7.5           | nd                        | nd     | nd   | nd    | trace                    | trace           | +             | nd     | nd       | trace     | Key fragments: 608, 754, 1281, 1297<br>Sensitive to HF (-1F), then MS/MS frag. 608                                                                             |
|    | 1443.56 | 10.5-11.5     | nd                        | nd     | nd   | 1.47  | trace                    | +               | +             | +      | +        | M, F      | Key fragments: 608, 827, 1135 (loss of 308), 1281<br>Sensitive to HF (-FH) then MS/MS frag. 608, 827<br>Sensitive to 3Man (-1H) then MS/MS 608, 973            |
|    | 1475.56 | 6,2           | 1.01                      | 0.67   | 0.36 | 1.09  | +                        | +               | +             | +      | +        | M, F      | Key fragment: 827<br>coelution with Pristionchus and Haemonchus                                                                                                |
|    | 1475.56 | 6,4           | 8.17                      | 5.83   | 4.66 | 12.55 | +                        | +               | +             | +      | +        | M, F      | Key fragment: 989<br>Sensitive to 2/3Man (-2H), then MS/MS frag. 665<br>coelution with Pristionchus                                                            |
|    | 1484.59 | 7.6           | nd                        | nd     | nd   | nd    | nd                       | +               | +             | nd     | nd       | M, F      | Key fragments: 446, 592, 1135, 1338<br>Resistant to FDL; sensitive to HF (-1F, then frag. 446) and to 3Man (-1H)<br>Elution after 1281 at 6.6 g.u.             |
|    | 1500.58 | 9,6           | nd                        | nd     | nd   | nd    | +                        | +               | +             | +      | +        | M, F      | Key fragments: 608, 1030, 1192, 1338<br>Sensitive to β4Gal (-1H, then frag. 446) and to FDL (-1N)                                                              |
|    | 1503.59 | 7.7           | nd                        | nd     | 1.59 | 4.71  | +                        | +               | +             | +      | +        | M, F      | Key fragments: 369, 531, 1057 (loss of 445), 1341 (loss of 162)<br>Sensitive to HF (-1PC, then frag. 446) and then to FDL (-1N)<br>coelution with Pristionchus |
|   | 1503.59 | 8.7           | nd                        | nd     | nd   | nd    | nd                       | nd              | trace         | +      | +        | trace     | Key fragments: 369, 531, 895 (loss of 607), 1195 (loss of 308; Figure 7A)                                                                                      |
|  | 1503.59 | 11-11.5       | nd                        | nd     | nd   | 1.19  | trace                    | trace           | +             | +      | +        | M, F      | Key fragments: 369, 531, 1058 (loss of 445), 1357 (loss of 146; Figure 7B)<br>Elution before 1338 isomer at 11.5 g.u.; coelution with Pristionchus             |
|  | 1516.58 | 6.7           | 0.48                      | nd     | 0.78 | 0.56  | nd                       | nd              | trace         | +      | trace    | trace     | Key fragments: 1030, 1313                                                                                                                                      |
|  | 1541.61 | 10-11         | nd                        | nd     | 0.18 | nd    | +                        | +               | +             | +      | +        | M, F      | Key fragments: 446, 1176, 1338<br>Sensitive to bov Fuc (-1F), then MS/MS frag. 300 (loss of core Fuc)<br>coelution with Pristionchus and Haemonchus            |
|  | 1560.61 | 7.0           | 3.11                      | 4.09   | 1.94 | 0.81  | +                        | +               | +             | +      | +        | M, F      | Key fragments: 369, 531, 1195 (loss of 365), 1357 (loss of 203)<br>Elution before 1395 at 7.8 g.u.<br>coelution with Pristionchus                              |
|  | 1589.62 | 7.7           | 0.60                      | 0.30   | nd   | nd    | +                        | +               | +             | nd     | nd       | M, F      | Key fragments: 607, 754, 827, 1135, 1281 (loss of 308)<br>Sensitive to HF (-F/FH) then MS/MS frag.608<br>Sensitive to 3Man (-1H)                               |
|  | 1637.60 | 5.5           | 4.42                      | 1.72   | 4.02 | 5.07  | +                        | +               | +             | +      | +        | M, F      | Key fragment: 989<br>coelution with Pristionchus and Haemonchus                                                                                                |
|  | 1637.60 | 6.0           | 2.89                      | 0.86   | 1.10 | 1.07  | nd                       | nd              | +             | +      | +        | trace     | Key fragment: 1151<br>coelution with Pristionchus and Haemonchus                                                                                               |

| Structure                                                                          | m/z     | RP-amide g.u. | % in RP (2D-HPLC, A only) |        |       |       | RP-amide (1D) occurrence |                 |               |        |          |           | Evidence                                                                                                                                                                                                |
|------------------------------------------------------------------------------------|---------|---------------|---------------------------|--------|-------|-------|--------------------------|-----------------|---------------|--------|----------|-----------|---------------------------------------------------------------------------------------------------------------------------------------------------------------------------------------------------------|
|                                                                                    |         |               | male                      | female | L4    | L3    | male A post F            | female A post F | female A only | male F | female F | Hydrazine |                                                                                                                                                                                                         |
| 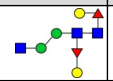   | 1646.64 | 10.5-11.5     | nd                        | nd     | nd    | nd    | trace                    | trace           | trace         | +      | +        | trace     | Key fragments: 608, 1030, 1338 (loss of 308)<br>Corresponds to one glycan in hex-2,hex-3 mutant                                                                                                         |
|    | 1649.64 | 8.5           | nd                        | nd     | nd    | nd    | nd                       | nd              | trace         | trace  | trace    | trace     | Key fragments: 369, 531, 1204 (loss of 445), 1341 (loss of 308)                                                                                                                                         |
|    | 1665.64 | 8.8           | nd                        | nd     | nd    | nd    | nd                       | nd              | +             | +      | +        | trace     | Key fragments: 369, 531, 1058 (loss of 607), 1503 (loss of H)<br>Sensitive to HF (-1PC) then MS/MS frag. 608<br>Elution before 1500 at 9.6 g.u.                                                         |
|    | 1665.64 | 12.5-13.5     | nd                        | nd     | nd    | nd    | nd                       | nd              | +             | +      | +        | nd        | Key fragments: 369, 531, 1058 (loss of 607), 1357 (loss of 308)                                                                                                                                         |
|    | 1706.67 | 9.5           | nd                        | nd     | nd    | 1.33  | nd                       | nd              | +             | +      | +        | trace     | Key fragments: 369, 531, 1260 (loss of 445)<br>Elution before 1541 at 10-11 g.u.<br>coelution with Pristionchus                                                                                         |
|    | 1725.66 | 4.8           | nd                        | nd     | nd    | nd    | nd                       | nd              | +             | +      | +        | M, F      | Key fragments: 369, 737, 900, 1563 (loss of 162; Figure 7C)<br>Sensitive to HF (-2PC), then MS/MS frags. 407 and 1233)<br>After HF, sensitive to chitinase (-1N), then MS/MS frags. 827, 1030           |
|    | 1725.66 | 6.8           | 0.54                      | nd     | nd    | nd    | +                        | +               | +             | +      | +        | M, F      | Key fragments: 369, 531, 1195 (loss of 530), 1357 (loss of 368; Figure 7D)<br>Sensitive to HF (-2PC) then MS/MS frag. 1030<br>coelution with Pristionchus/Haemonchus (before 1395/1560 at 7.8/7.0 g.u.) |
|    | 1725.66 | 8.0           | nd                        | nd     | nd    | nd    | nd                       | nd              | +             | +      | +        | trace     | Key fragments: 369, 737                                                                                                                                                                                 |
|   | 1763.66 | 4.3           | nd                        | nd     | nd    | nd    | nd                       | nd              | +             | +      | +        | trace     | Key fragments: 369, 531, 734, 896, 1561 (loss of N)                                                                                                                                                     |
|  | 1799.66 | 5.2           | 11.10                     | 3.95   | 16.20 | 11.95 | +                        | +               | +             | +      | +        | M, F      | Key fragment: 1151<br>coelution with Pristionchus and Haemonchus                                                                                                                                        |
|  | 1799.66 | 5.8           | 0.23                      | 0.16   | 0.59  | 0.52  | nd                       | nd              | +             | +      | +        | trace     | Key fragment: 989<br>coelution with Pristionchus and Haemonchus                                                                                                                                         |
|  | 1811.70 | 9.8           | nd                        | nd     | nd    | nd    | nd                       | nd              | nd            | +      | +        | F         | Key fragments: 369, 531, 1204 (loss of 607), 1503 (loss of 308)                                                                                                                                         |
|  | 1871.72 | 8.5           | nd                        | nd     | nd    | nd    | nd                       | nd              | +             | +      | +        | M, F      | Key fragments: 369, 531, 1426 (loss of 445), 1503 (loss of 368)<br>coelution with Pristionchus; elution before 1706 at 9.5 g.u.                                                                         |
|  | 1928.74 | 4.8           | nd                        | nd     | nd    | nd    | nd                       | nd              | +             | +      | +        | M, F      | Key fragments: 369, 531, 734, 1560, 1725 (loss of N)                                                                                                                                                    |
|  | 1961.71 | 5.5           | 5.64                      | 4.69   | 9.53  | 11.01 | +                        | +               | +             | +      | +        | M, F      | Key fragment: 1151<br>coelution with Pristionchus and Haemonchus                                                                                                                                        |
|  | 2033.77 | 9.8           | nd                        | nd     | nd    | nd    | nd                       | nd              | +             | +      | +        | M, F      | Key fragments: 369, 531, 1426 (loss of 607), 1503 (loss of 531)<br>Sensitive to β4Gal (-1H), then MS/MS frag. 1426 (loss of 445)                                                                        |
|  | 2093.80 | 3.8           | nd                        | nd     | nd    | nd    | nd                       | nd              | +             | nd     | nd       | nd        | Key fragments: 369, 737, 1105<br>Sensitive to HF (-3PC), then MS/MS frag. 407, 610                                                                                                                      |

| Structure | m/z     | RP-amide g.u. | % in RP (2D-HPLC, A only) |        |    |    | RP-amide (1D) occurrence |                 |               |        |          |           | Evidence                                                                                                                                             |
|-----------|---------|---------------|---------------------------|--------|----|----|--------------------------|-----------------|---------------|--------|----------|-----------|------------------------------------------------------------------------------------------------------------------------------------------------------|
|           |         |               | male                      | female | L4 | L3 | male A post F            | female A post F | female A only | male F | female F | Hydrazine |                                                                                                                                                      |
|           | 2093.80 | 4.2           | nd                        | nd     | nd | nd | nd                       | nd              | +             | +      | +        | M, F      | Key fragments: 369, 899, 1725 (loss of 368; Figure 7E)                                                                                               |
|           | 2093.80 | 6.4           | nd                        | nd     | nd | nd | nd                       | nd              | +             | +      | +        | M, F      | Key fragments: 369, 737, 899, 1725 (loss of 368; Figure 7F)<br>Sensitive to HF (-3PC), then MS/MS frag, 407, 1233                                    |
|           | 2093.80 | 7.6           | nd                        | nd     | nd | nd | nd                       | nd              | +             | +      | +        | M, F      | Key fragments: 369, 737, 1105, 1357 (loss of 736), 1725 (loss of 368)<br>Sensitive to HF (-3PC, then 407 and 610), then chitinase (-2N; Figure 7K-P) |
|           | 2109.82 | 11.0          | nd                        | nd     | nd | nd | nd                       | nd              | nd            | nd     | +        | nd        | Key fragments: 568, 730, 608, 1233                                                                                                                   |
|           | 2123.76 | 6.6           | nd                        | nd     | nd | nd | nd                       | nd              | nd            | trace  | +        | +         | Key fragment: 1313<br>coelution with Pristionchus                                                                                                    |
|           | 2131.82 | 7.6           | nd                        | nd     | nd | nd | nd                       | nd              | nd            | nd     | nd       | M         | Key fragments: 369, 572, 734, 1195, 1560 (loss of 571; Figure 7G)<br>Sensitive to HEX-4 (-2N) and HF (-2PC, then MS/MS with 407 and 1233)            |
|           | 2239.86 | 5.2           | nd                        | nd     | nd | nd | nd                       | nd              | nd            | nd     | nd       | M, F      | Key fragments: 369, 531, 899, 1794 (loss of 445), 1871 (loss of 368; Figure 7H)<br>Sensitive to HF (-3PC)                                            |
|           | 2239.86 | 7.8           | nd                        | nd     | nd | nd | nd                       | nd              | nd            | +      | nd       | nd        | Key fragments: 369, 737, 899, 1794 (loss of 445), 1871 (loss of 368)<br>Sensitive to HF (-3PC)                                                       |
|           | 2274.88 | 7.6           | nd                        | nd     | nd | nd | nd                       | nd              | nd            | nd     | +        | F         | Key fragments: 369, 531, 734, 896, 1667 (loss of 607), 1966 (loss of 308)                                                                            |
|           | 2461.93 | 6.3           | nd                        | nd     | nd | nd | nd                       | nd              | nd            | nd     | +        | M, F      | Key fragments: 369, 737, 1106, 1725 (loss of 737), 2094 (loss of 368; Figure 7I)                                                                     |
|           | 2666.01 | 3.5           | nd                        | nd     | nd | nd | nd                       | nd              | +             | +      | +        | nd        | Key fragments: 369, 737, 1105, 1635, 1928 (loss of 736), 2298 (loss of 368; Figure 7J)                                                               |
